# Supplementary material for: Rational design of a polypyrrole-based competent bifunctional magnetic nanocatalyst
Source: Royal Society of Chemistry journal article supplement (doi:10.1039/c9ra02544h), 2019-01-01
Supplement: c9ra02544h1.pdf [file c9ra02544h1.pdf]

## Supporting Information

### **Rational design of polypyrrole-based competent bifunctional magnetic nanocatalyst**

Wael A. Amer<sup>a</sup>, Basel Al-saida<sup>a, b</sup>, and Mohamad M. Ayad<sup>a, c\*</sup>

<sup>a</sup> *Chemistry Department, Faculty of Science, Tanta University, Tanta 31527, Egypt*

<sup>b</sup> *Chemistry Department, Faculty of Science, Al-Balqa Applied University, Al-Salt19117, Jordan*

<sup>c</sup> *Institute of Basic and Applied Sciences, Egypt-Japan University of Science and Technology, New Borg El-Arab City, Alexandria 21934, Egypt*

---

\*Corresponding author: Tel.: +20 3 459 9520; Fax: +20 3 459 9520  
E-mail: mohamad.ayad@ejust.edu.eg

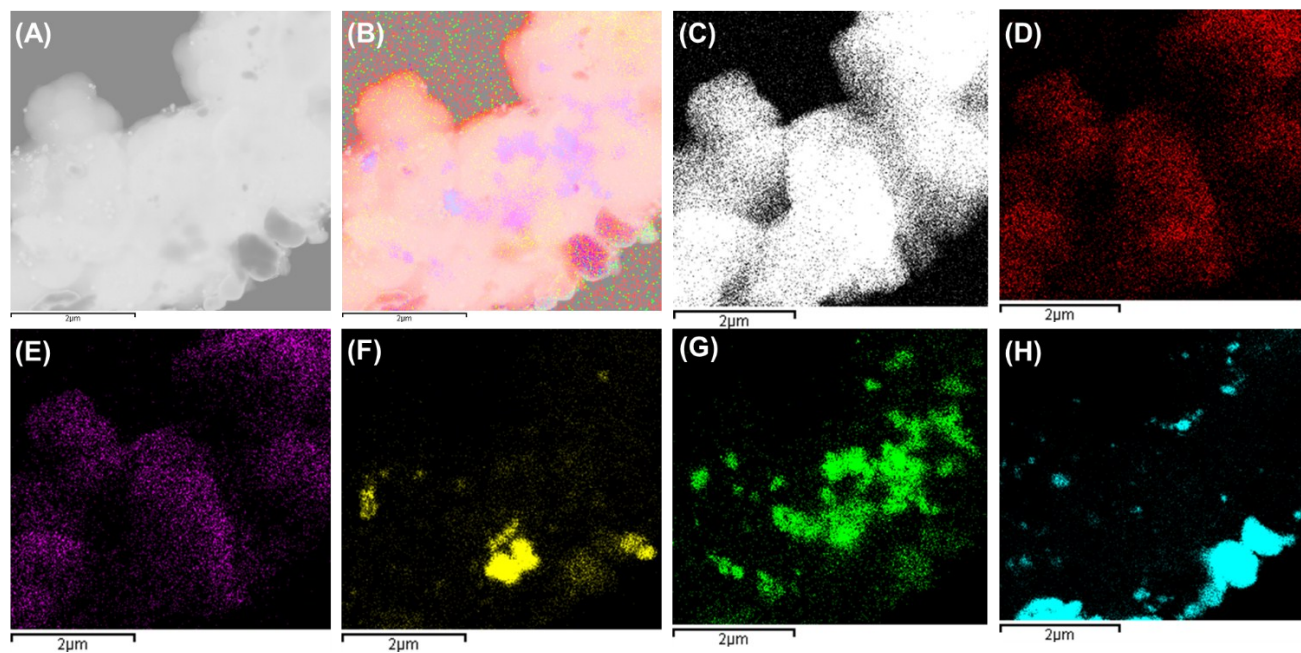

**Figure S1.** Elemental mapping of MTPS nanocomposite; image used for mapping (A), all elements distribution (B), carbon distribution (C), oxygen distribution (D), nitrogen distribution (E), iron distribution (F), titanium distribution (G) and silver distribution (H).

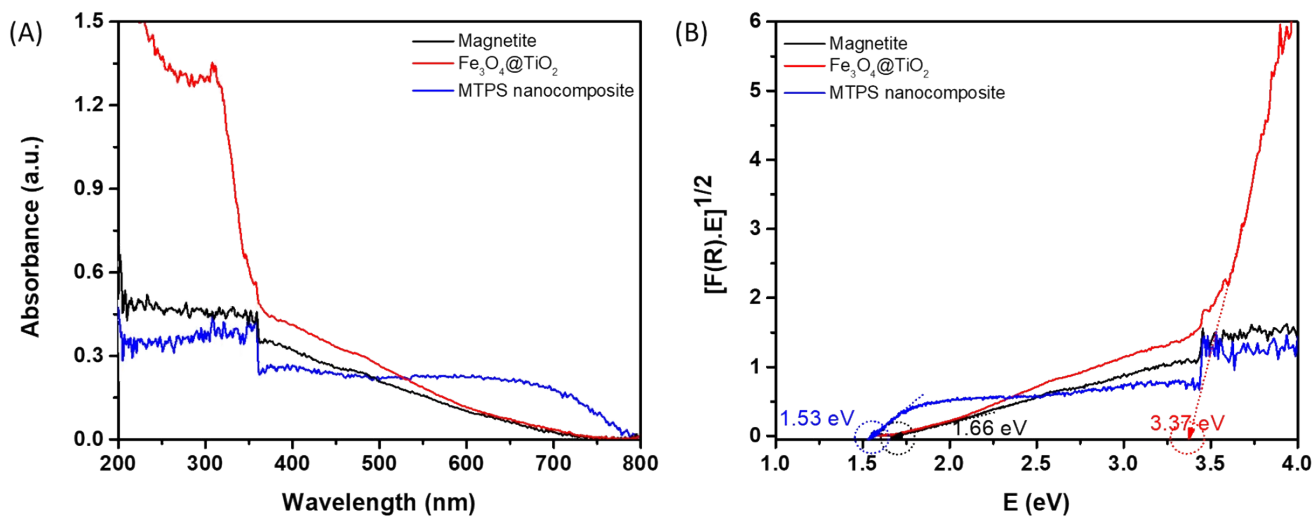

**Figure S2.** UV-vis DRS (A) and the band gaps (B) of the as-synthesized nanomaterials.

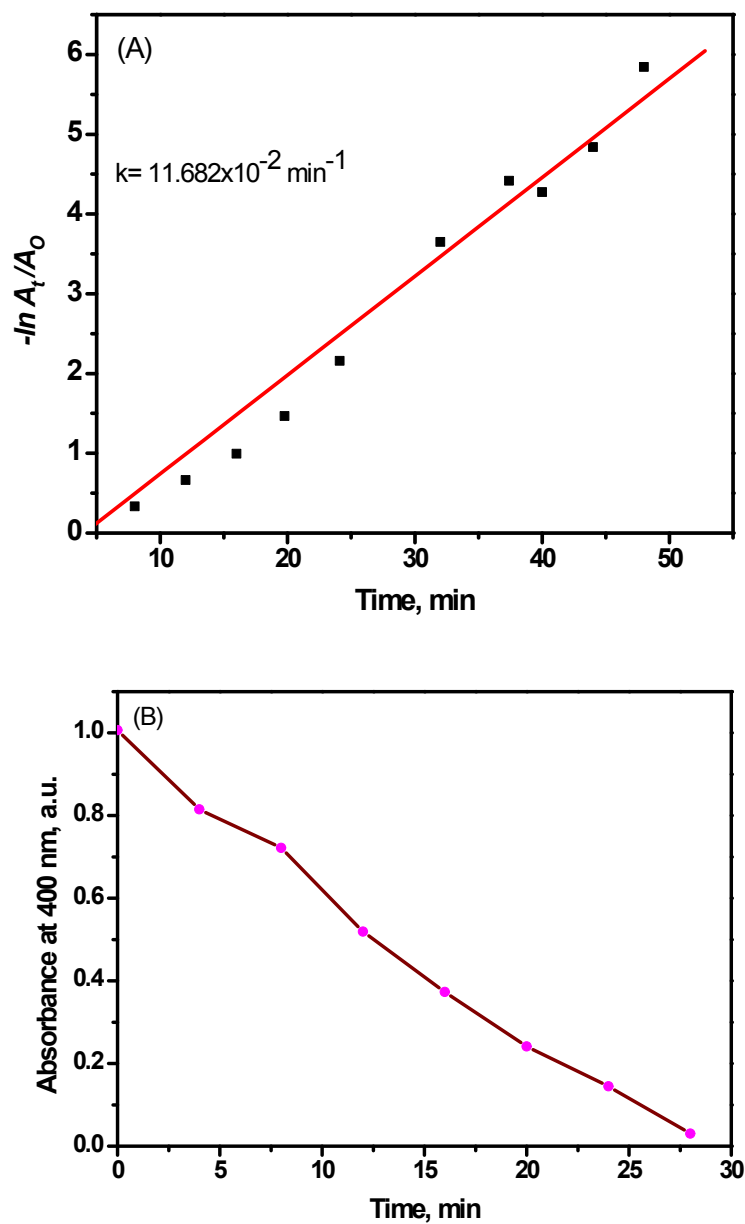

**Figure S3.**  $-\ln A_t/A_o$  vs. time (A) and time-dependent change of the absorbance at 400 nm (B) for the reduction reaction of PNP by NaBH<sub>4</sub> using MTPS nanocatalyst.

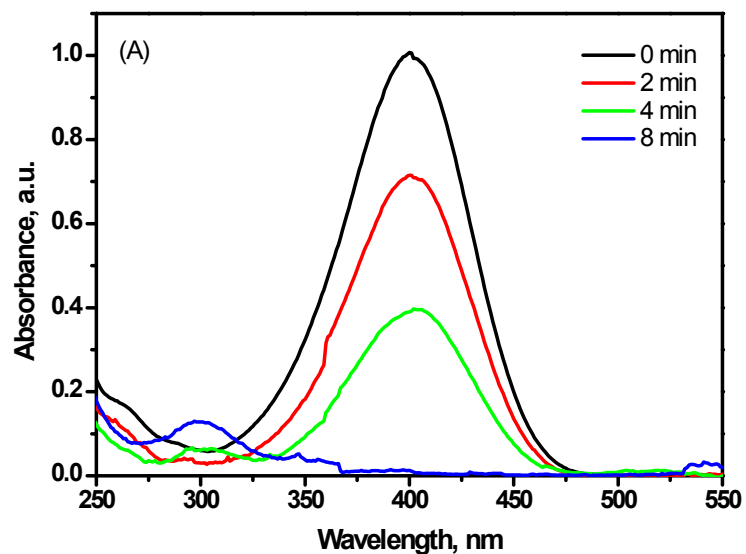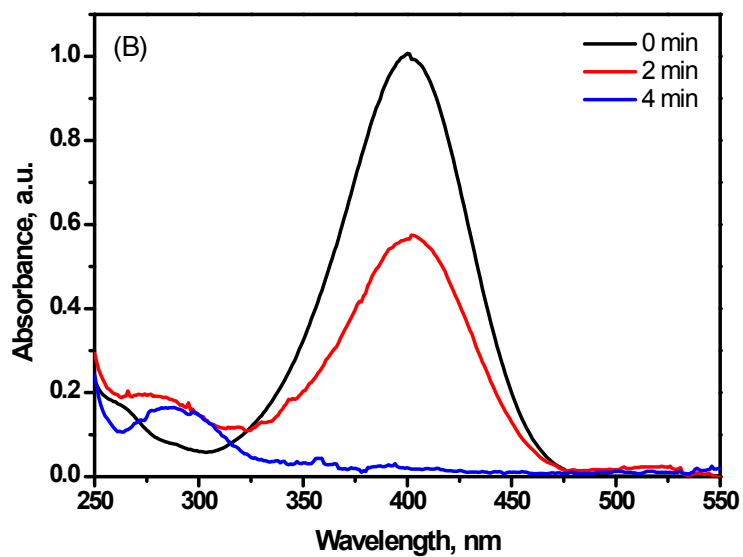

**Figure S4.** UV-vis spectra for reduction of PNP to PAP in the presence of 2 mg (A), and 3 mg (B) of MTPS nanocatalyst.

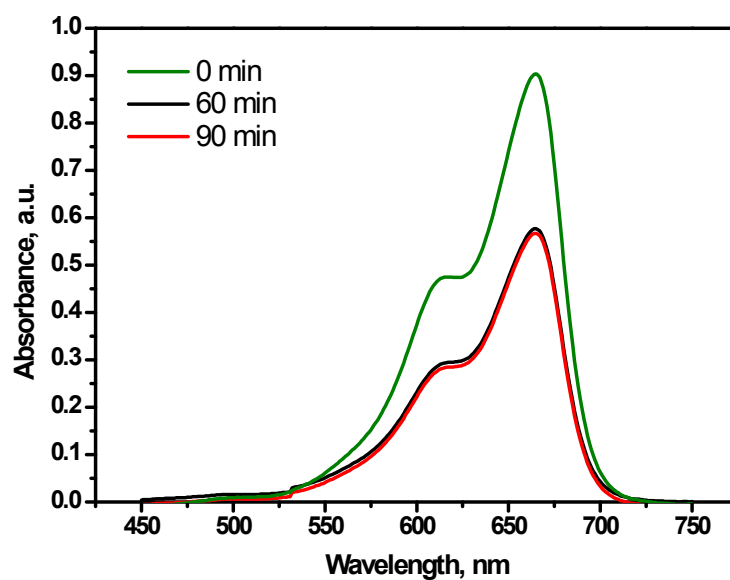

**Figure S5.** Time-resolved spectra of MB dye ( $4 \text{ mg L}^{-1}$ ) with 40 mg MPTS nanocomposite under the dark condition.

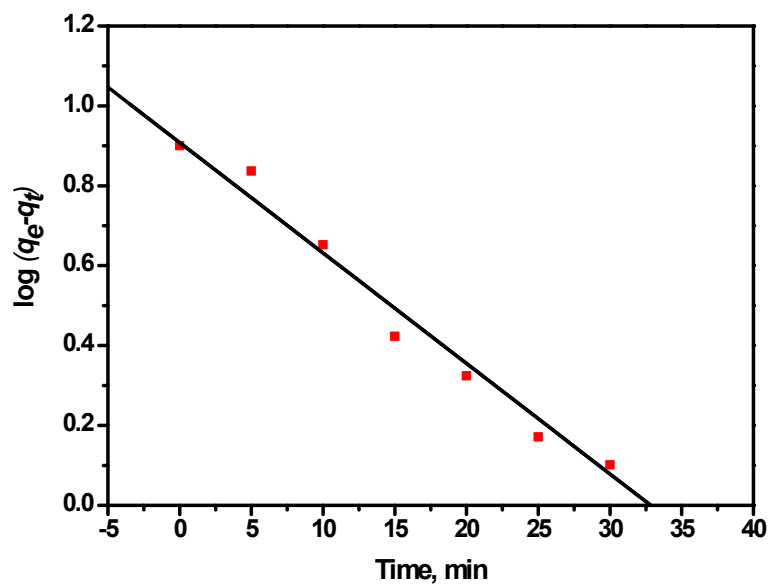

**Figure S6.** Pseudo-first order kinetics for the photocatalytic degradation of MB using MTPS as a nanophotocatalyst at 25 °C
